# Supplementary material for: Integrating a Unique Mindfulness-Based Stress Reduction Training into the First-Year Medical Student Curriculum
Source: Research Square preprint supplement (doi:10.21203/rs.3.rs-6595275/v1), 2025-06-27
Supplement: Supplementary file 1 [file cae5387ef8684ac46b664dc9.docx]

**Supplemental Materials**

Perceived Stress Scale

The Perceived Stress Scale (PSS) is a classic stress assessment instrument. The tool, while originally developed in 1983, remains a popular choice for helping us understand how different situations affect our feelings and our perceived stress. The questions in this scale ask about your feelings and thoughts during the last month. In each case, you will be asked to indicate how often you felt or thought a certain way. Although some of the questions are similar, there are differences between them and you should treat each one as a separate question. The best approach is to answer fairly quickly. That is, don’t try to count up the number of times you felt a particular way; rather indicate the alternative that seems like a reasonable estimate. - never 1 - almost never 2 metimes 3 - fairly often 4 - very often

l. In the last month, how often have you been upset because of something that happened unexpectedly?

2. In the last month, how often have you felt that you were unable to control the

important things in your life?

3. In the last month, how often have you felt nervous and stressed?

4. In the last month, how often have you felt confident about your ability to handle your personal problems?

5. In the last month, how often have you felt that things were going your way?

6. In the last month, how often have you found that you could not cope with

all the things that you had to do?

7. In the last month, how often have you been able to control irritations in

your life?

8. In the last month, how often have you felt that you were on top of things?

9. In the last month, how often have you been angered because of things that

happened that were outside of your control?

10. In the last month, how often have you felt difficulties were piling up so high that

you could not overcome them?
